# Supplementary material for: A new, cheap, and productive FeP anode material for sodium-ion batteries
Source: Royal Society of Chemistry journal article supplement (doi:10.1039/c4cc09604e), 2015-01-01
Supplement: c4cc09604e1.pdf [file c4cc09604e1.pdf]

## Supporting Information

### A new, cheap, productive FeP anode material for sodium-ion batteries - Understanding the Na storage mechanism

*Wei-Jie Li,<sup>a</sup> Shu-Lei Chou,<sup>a,\*</sup> Jia-Zhao Wang,<sup>a</sup> Hua-Kun Liu,<sup>a</sup> Shi-Xue Dou<sup>a</sup>*

<sup>a</sup>Institute for Superconducting and Electronic Materials, University of Wollongong.  
Wollongong, NSW 2522 Australia.

\*Corresponding E-mail: [shulei@uow.edu.au](mailto:shulei@uow.edu.au)

## Experimental Section

*Synthesis of FeP phosphide:* Fe (>99.5%, Sigma) and red P (>99 %, Sigma) were used as the starting materials without further purifying. FeP was prepared by the simple ball-milling method using the corresponding stoichiometric molar ratio of the metal (Fe) to P. The starting materials were put into a hardened steel vial with milling balls 2 mm in diameter. The weight ratio of milling balls to powder was 20:1. The vial was assembled in an argon-filled glove-box, and then mounted on the ball mill. The rotation speed of the mill was set to 300 rpm for 20 h.

*Characterization:* The crystalline structure of the active powder was characterized by powder X-ray diffraction (XRD) on a GBC MMA diffractometer with a Cu K $\alpha$  source. The morphology of the sample was investigated by field emission scanning electron microscopy (FESEM; JEOL JSM-7500FA) and transmission electron microscopy (TEM, JEOL 2011, 200 keV). X-ray photoelectron spectroscopy (XPS) was conducted using a SPECS PHOIBOS 100 Analyser installed in a high-vacuum chamber with base pressure below 10<sup>-8</sup> mbar. X-ray excitation was provided by Al K $\alpha$  radiation with photon energy  $h\nu = 1486.6$  eV at the high voltage of 12 kV and power of 120 W. Ex-situ XRD data were collected by powder X-ray diffraction (XRD) on a GBC MMA diffractometer with a Cu K $\alpha$  source. The cell used for the data collection was charged at a current density of 100 mA g<sup>-1</sup> between 0 V and 1.5 V.

*Electrochemical measurements:* The FeP electrodes were prepared by mixing 70% active materials, 10% carbon black, and 20% binder by weight to form an electrode slurry, which then was coated on copper foil, followed by drying in a vacuum oven overnight at 80 °C, and then pressing at 30 MPa. The electrode was punched into a round area with 5 mg cm<sup>-2</sup>. Three kinds of FeP electrodes were prepared by changing the binders: carboxymethyl cellulose (CMC), Poly(vinylidene fluoride) (PVDF), carboxymethyl cellulose (CMC)/Poly(acrylic acid) (PAA). The sodium foil was cut by the doctor blade technique from a sodium bulk stored in mineral oil, which then was employed as both reference and counter electrode. The electrolyte was 1.0 mol/L

NaClO<sub>4</sub> in an ethylene carbonate (EC) - diethyl carbonate (DEC) solution (1:1 v/v), with or without 5 vol.% addition of fluoroethylene carbonate (FEC). The cells were assembled in an argon-filled glove box. The electrochemical performances were tested by a Land Test System at current density of 50 mA g<sup>-1</sup> in the voltage range of 0–1.5 V (vs. Na<sup>+</sup>/Na).

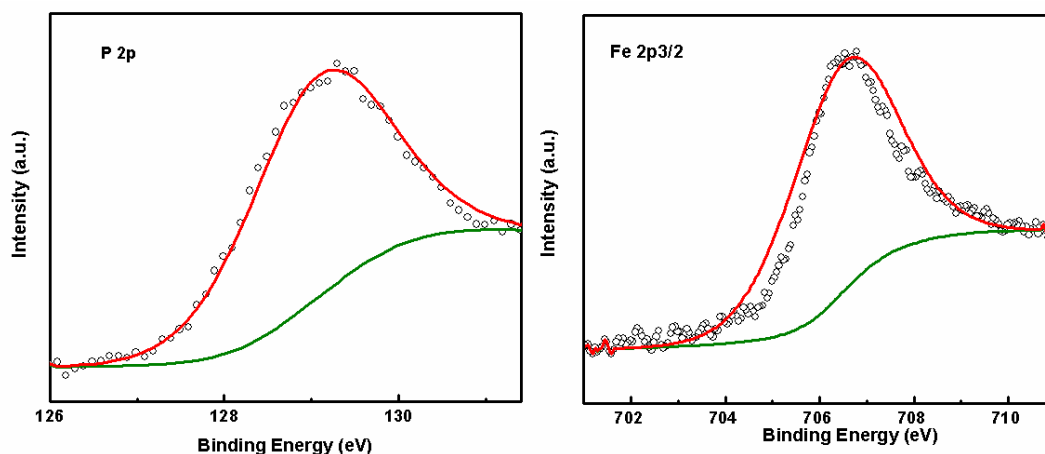

**Figure S1** X-ray photoelectron spectroscopy (XPS) of the as-prepared FeP.

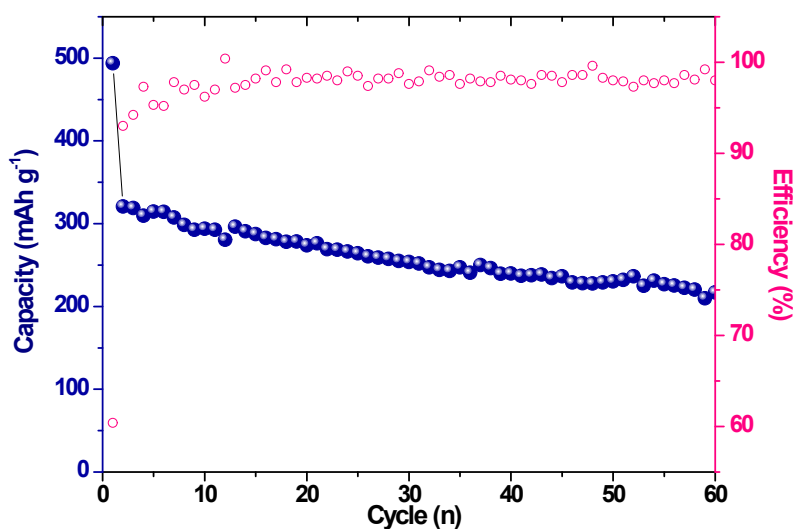

**Figure S2.** The cycling performance of FeP with CMC/PAA binder in the electrolyte of 1M NaClO<sub>4</sub>/EC:DEC with 5% FEC additive.

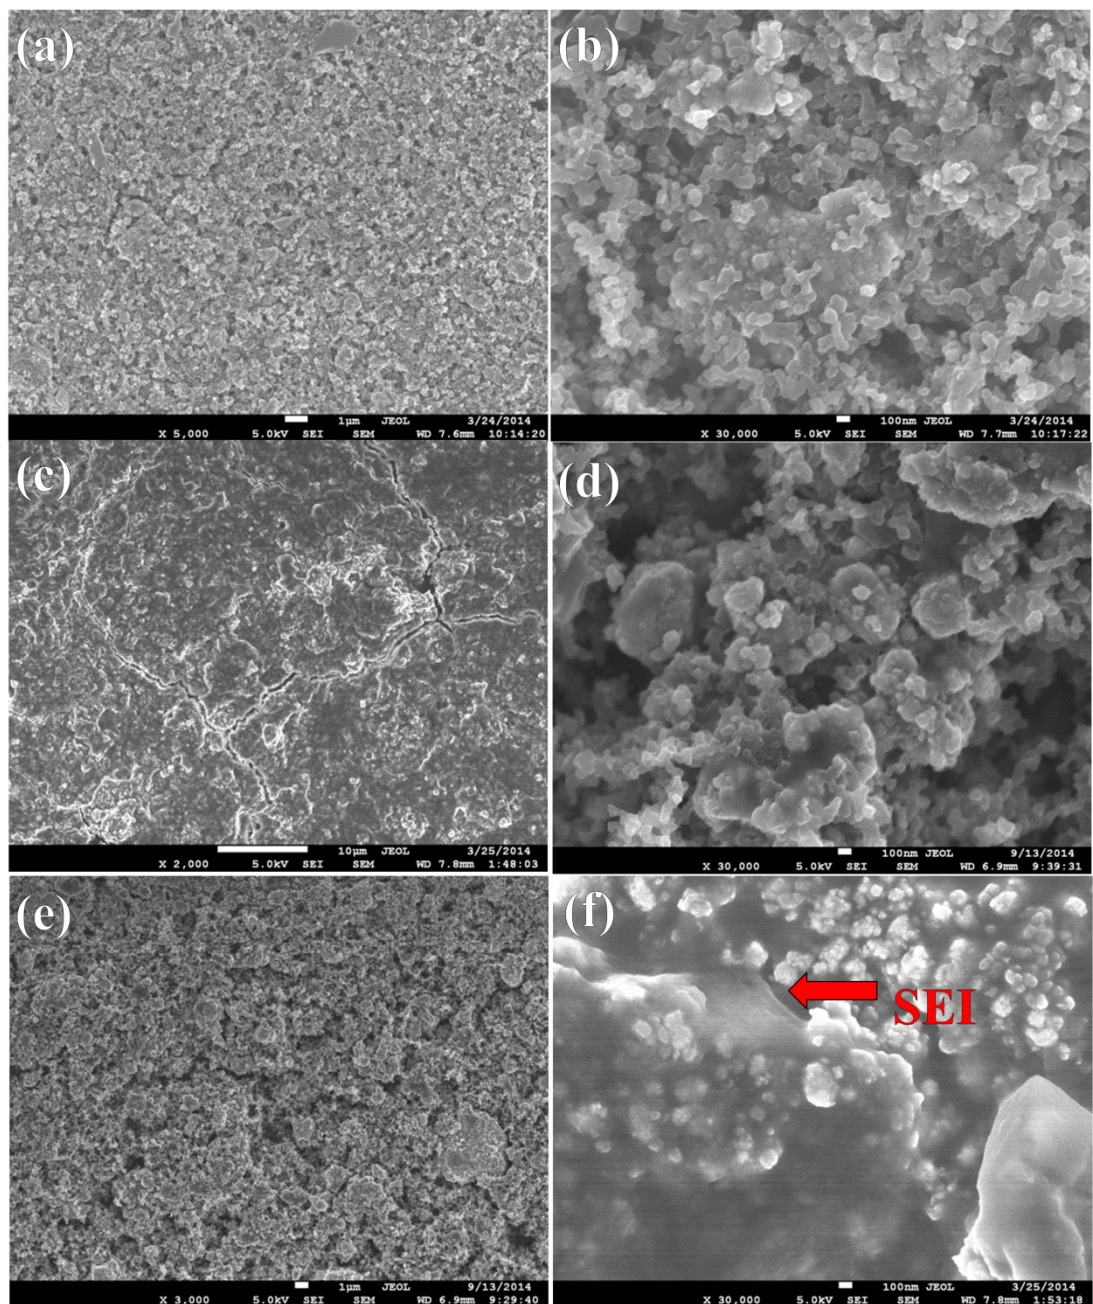

**Figure S3.** SEM images of FeP Electrodes with CMC/PAA binder (a, b) before and (c - f) after 5 cycles in the electrolyte (c, d) without FEC and (e, f) with FEC additive.

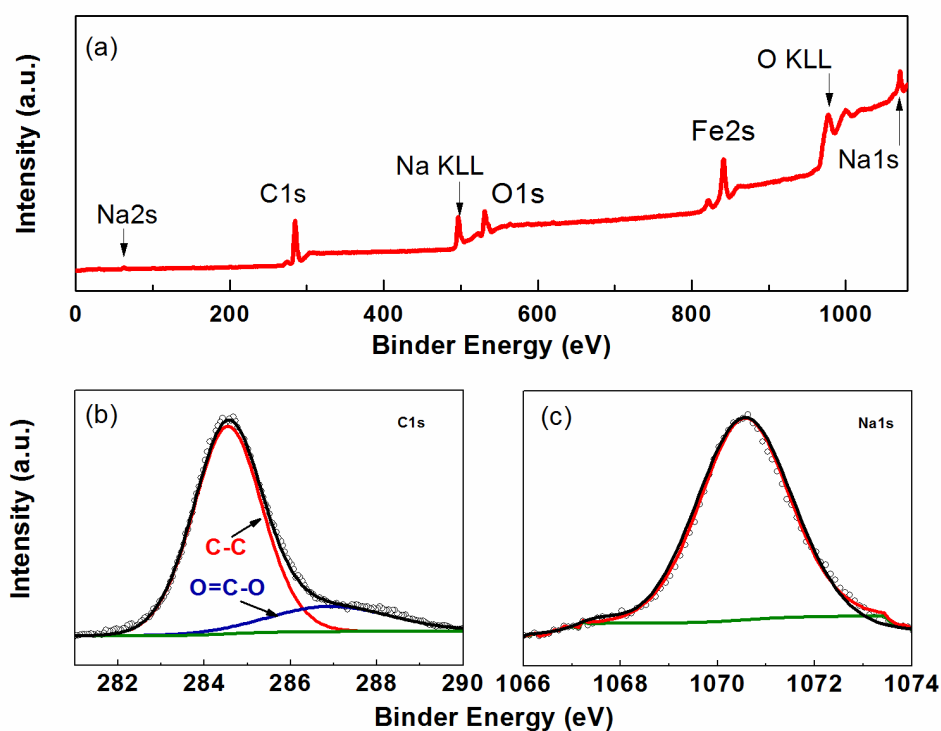

**Figure S4.** X-ray photoelectron spectroscopy (XPS) of the FeP electrode after 1 cycle in the electrolyte with FEC additive: (a) survey spectrum; (b) C1s; (c) Na1s.

The C1s spectra and its fitting curves are presented in Figure S4(b). The peaks at the bonding energy of 284.6 and 287.2 eV are corresponding to the group of C-C and O=C-O, respectively. Moreover, the signal of Na 1s can be detected, but the signal from the elements of P and Fe 2p cannot be detected by XPS, suggesting a thick SEI layer covering on the surface of the electrode and its composition is  $\text{NaCO}_3$ .

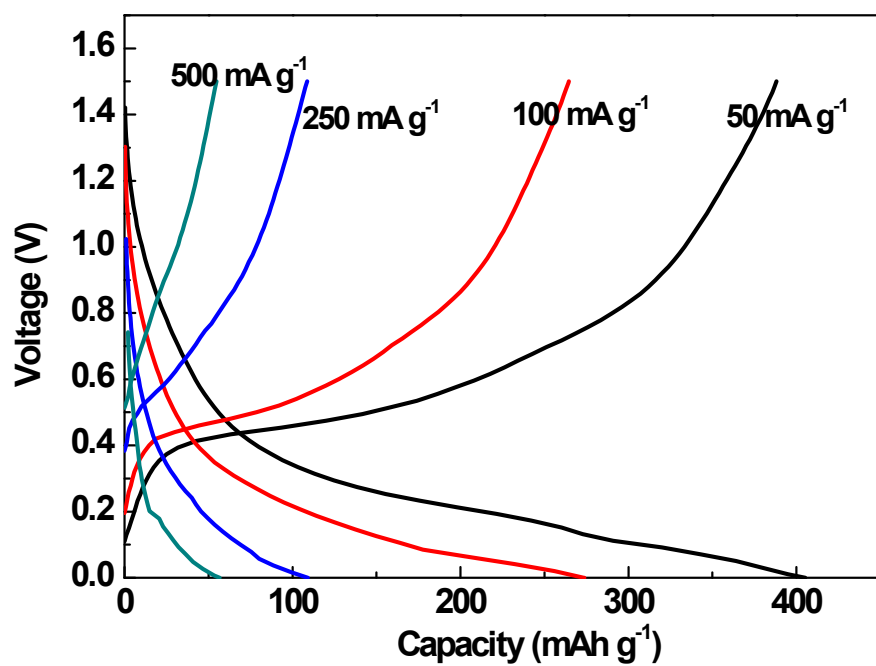

**Figure S5.** The rate capability of FeP tested at different current density.
